# Supplementary material for: Experimental and theoretical investigations of porphyrin derivatives as corrosion inhibitors for carbon steel in acidic environments
Source: Royal Society of Chemistry journal article supplement (doi:10.1039/d6ra00078a), 2026-03-27
Supplement: d6ra00078a1.pdf [file d6ra00078a1.pdf]

## Experimental and Theoretical Investigations of porphyrin Derivatives as Corrosion Inhibitors for Carbon Steel in Acidic Environments

Abd El-Aziz S. Fouda<sup>1,\*</sup>, A. M. Elesawy<sup>2</sup>, S. M. Rashwan<sup>2</sup>, M. M. Kamel<sup>2</sup>, M.E. Eissa<sup>3</sup>,  
H.E. Ibrahim<sup>2</sup>

<sup>1</sup> Chemistry Department, Faculty of Science, Mansoura University, Mansoura-35516, Egypt

<sup>2</sup> Department of Chemistry, Faculty of Science, Suez Canal University., Egypt.

<sup>3</sup>Chemistry Department, College of Science, Imam Mohammad Ibn Saud Islamic University (IMSIU), Riyadh 11623, Saudi Arabia

\* Corresponding author: [asfouda@mans.edu.eg](mailto:asfouda@mans.edu.eg), ORCID:0000-0002-3239-4417

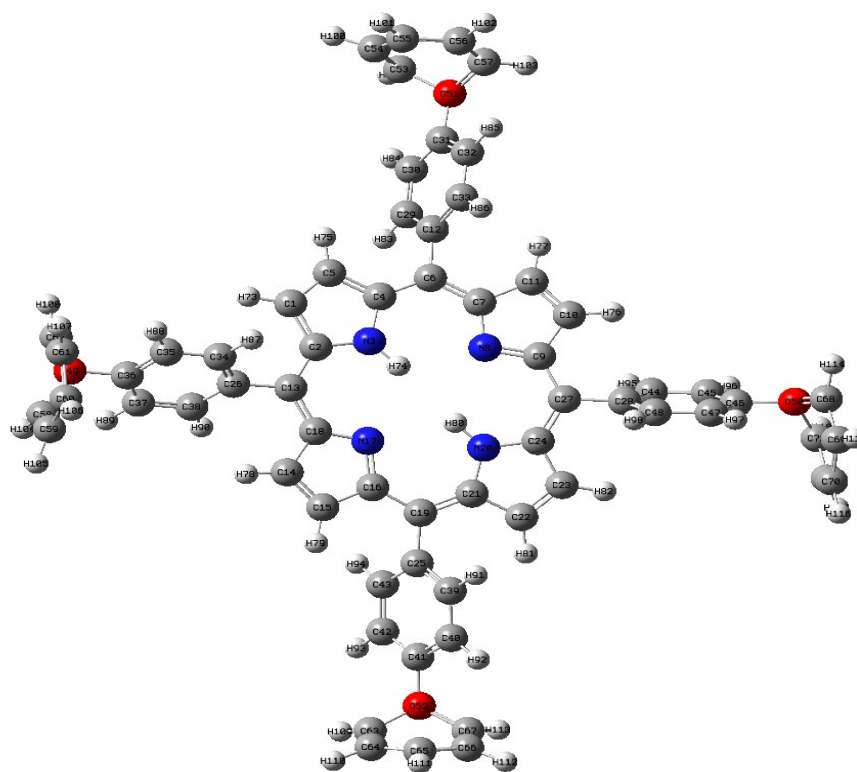

Fig. S1 The optimized geometries of PF-1

Table S1 the calculated Fukui index values of reactive sites on PF-1

| Electrophilic Attack (Fukui(-)) | Nucleophilic Attack (Fukui(+)) | atom  |
|---------------------------------|--------------------------------|-------|
| 0.012                           | 0.013                          | C (1) |
| 0.010                           | 0.011                          | C (2) |
| 0.006                           | 0.007                          | N (3) |
| 0.009                           | 0.010                          | C (4) |
| 0.012                           | 0.014                          | C (5) |
| 0.016                           | 0.018                          | C (6) |
| 0.010                           | 0.011                          | C (7) |
| 0.010                           | 0.011                          | N (8) |

|        |        |         |
|--------|--------|---------|
| 0.011  | 0.011  | C (9)   |
| 0.011  | 0.013  | C ( 10) |
| 0.012  | 0.013  | C ( 11) |
| -0.004 | -0.004 | C ( 12) |
| 0.015  | 0.016  | C ( 13) |
| 0.012  | 0.013  | C ( 14) |
| 0.012  | 0.013  | C ( 15) |
| 0.009  | 0.010  | C ( 16) |
| 0.010  | 0.010  | N ( 17) |
| 0.011  | 0.011  | C ( 18) |
| 0.016  | 0.018  | C ( 19) |
| 0.006  | 0.007  | N ( 20) |
| 0.009  | 0.010  | C ( 21) |
| 0.012  | 0.013  | C ( 22) |
| 0.012  | 0.013  | C ( 23) |
| 0.01   | 0.011  | C ( 24) |
| -0.003 | -0.003 | C ( 25) |
| -0.004 | -0.005 | C ( 26) |
| 0.014  | 0.016  | C ( 27) |
| -0.005 | -0.006 | C ( 28) |
| 0.004  | 0.004  | C ( 29) |
| 0.004  | 0.005  | C ( 30) |
| 0.002  | 0.002  | C ( 31) |
| 0.003  | 0.003  | C ( 32) |
| 0.003  | 0.003  | C ( 33) |
| 0.004  | 0.004  | C ( 34) |
| 0.003  | 0.003  | C ( 35) |
| 0.001  | 0.001  | C ( 36) |
| 0.005  | 0.005  | C ( 37) |
| 0.004  | 0.004  | C ( 38) |
| 0.004  | 0.004  | C ( 39) |
| 0.004  | 0.004  | C ( 40) |
| 0.001  | 0.001  | C ( 41) |
| 0.006  | 0.006  | C ( 42) |
| 0.004  | 0.005  | C ( 43) |
| 0.004  | 0.004  | C ( 44) |
| 0.005  | 0.005  | C ( 45) |
| 0.000  | 0.000  | C ( 46) |
| 0.003  | 0.003  | C ( 47) |
| 0.005  | 0.005  | C ( 48) |
| 0.000  | 0.000  | O ( 49) |
| 0.000  | 0.000  | O ( 50) |
| 0.000  | 0.000  | O ( 51) |
| 0.000  | 0.000  | O ( 52) |
| 0.016  | 0.014  | C ( 53) |
| 0.005  | 0.004  | C ( 54) |

|       |       |         |
|-------|-------|---------|
| 0.018 | 0.016 | C ( 55) |
| 0.003 | 0.003 | C ( 56) |
| 0.016 | 0.014 | C ( 57) |
| 0.019 | 0.017 | C ( 58) |
| 0.005 | 0.005 | C ( 59) |
| 0.020 | 0.018 | C ( 60) |
| 0.003 | 0.003 | C ( 61) |
| 0.018 | 0.017 | C ( 62) |
| 0.023 | 0.022 | C ( 63) |
| 0.006 | 0.005 | C ( 64) |
| 0.024 | 0.023 | C ( 65) |
| 0.003 | 0.003 | C ( 66) |
| 0.023 | 0.021 | C ( 67) |
| 0.022 | 0.020 | C ( 68) |
| 0.003 | 0.003 | C ( 69) |
| 0.023 | 0.021 | C ( 70) |
| 0.005 | 0.005 | C ( 71) |
| 0.022 | 0.020 | C ( 72) |

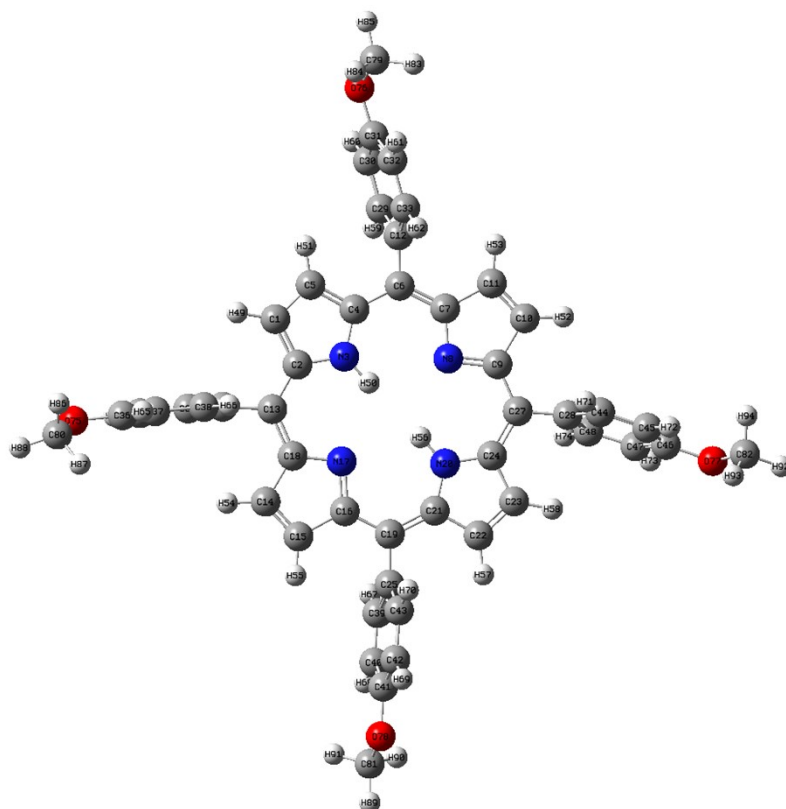

**Fig. S2** The optimized geometries of PF-2

**Table S2 the calculated Fukui index values of reactive sites on PF-2**

| Electrophilic Attack (Fukui(-)) | Nucleophilic Attack (Fukui(+)) | atom    |
|---------------------------------|--------------------------------|---------|
| 0.016                           | 0.025                          | C ( 1)  |
| 0.013                           | 0.02                           | C ( 2)  |
| 0.015                           | 0.014                          | N ( 3)  |
| 0.013                           | 0.02                           | C ( 4)  |
| 0.016                           | 0.025                          | C ( 5)  |
| 0.038                           | 0.036                          | C ( 6)  |
| 0.011                           | 0.019                          | C ( 7)  |
| 0.026                           | 0.021                          | N ( 8)  |
| 0.012                           | 0.020                          | C ( 9)  |
| 0.012                           | 0.024                          | C ( 10) |
| 0.012                           | 0.024                          | C ( 11) |
| -0.003                          | -0.008                         | C ( 12) |
| 0.037                           | 0.034                          | C ( 13) |
| 0.012                           | 0.024                          | C ( 14) |
| 0.013                           | 0.025                          | C ( 15) |
| 0.012                           | 0.02                           | C ( 16) |
| 0.027                           | 0.021                          | N ( 17) |
| 0.012                           | 0.02                           | C ( 18) |
| 0.038                           | 0.034                          | C ( 19) |
| 0.015                           | 0.014                          | N ( 20) |
| 0.013                           | 0.02                           | C ( 21) |
| 0.016                           | 0.026                          | C ( 22) |
| 0.016                           | 0.025                          | C ( 23) |
| 0.013                           | 0.02                           | C ( 24) |
| -0.005                          | -0.01                          | C ( 25) |
| -0.004                          | -0.009                         | C ( 26) |
| 0.037                           | 0.034                          | C ( 27) |
| -0.004                          | -0.009                         | C ( 28) |
| 0.007                           | 0.004                          | C ( 29) |
| 0.01                            | 0.007                          | C ( 30) |
| 0.011                           | 0.008                          | C ( 31) |
| 0.01                            | 0.006                          | C ( 32) |
| 0.009                           | 0.005                          | C ( 33) |
| 0.007                           | 0.004                          | C ( 34) |
| 0.01                            | 0.007                          | C ( 35) |
| 0.011                           | 0.008                          | C ( 36) |
| 0.009                           | 0.006                          | C ( 37) |
| 0.008                           | 0.005                          | C ( 38) |
| 0.008                           | 0.004                          | C ( 39) |
| 0.009                           | 0.006                          | C ( 40) |
| 0.01                            | 0.007                          | C ( 41) |
| 0.009                           | 0.006                          | C ( 42) |
| 0.006                           | 0.003                          | C ( 43) |
| 0.008                           | 0.005                          | C ( 44) |

|        |        |         |
|--------|--------|---------|
| 0.009  | 0.006  | C ( 45) |
| 0.011  | 0.008  | C ( 46) |
| 0.01   | 0.007  | C ( 47) |
| 0.007  | 0.004  | C ( 48) |
| 0.012  | 0.006  | O ( 75) |
| 0.012  | 0.006  | O ( 76) |
| 0.011  | 0.005  | O ( 77) |
| 0.011  | 0.005  | O ( 78) |
| -0.003 | -0.002 | C ( 79) |
| -0.003 | -0.002 | C ( 80) |
| -0.003 | -0.002 | C ( 81) |
| -0.003 | -0.002 | C ( 82) |
